# Supplementary material
Source: HighWire-hosted journal article supplement (https://bmjopenquality.bmj.com/highwire/filestream/145560/field_highwire_adjunct_files/0/bmjoq-2022-002239supp001_data_supplement.pdf)
Supplement: bmjoq-2022-002239supp001_data_supplement.pdf [file bmjoq-2022-002239supp001_data_supplement.pdf]

## Supplement 1 Semi-structured interview guides

The original interview guides were developed in Norwegian. The interview guides below contains the main questions translated into English.

### Period 1: Before the ED pharmacist intervention

- Why not start by telling me what happened in the emergency department?
- Can you describe your experience, with regards to medications, during your ED visit?
- What focus did the health care professionals have on medication?
- What information did you get about what was happening in the ED?
- Did you have any questions about your medications and, if so, who did you ask?
- In general, what do you think the hospital needs to know about your medication use?
- If you think about your medication use, do you have any particular needs? What information do you need?
- How did you experience your stay at the emergency department when it comes to medication? What worked or what did not?
- Do you have any experiences with meeting a pharmacist? Do you have knowledge about what a pharmacist does?
- What do you think a pharmacist can contribute with in the emergency department?
- What would you think about a pharmacist asking you about your medications during your next ED visit?

### Period 2: During the ED pharmacist intervention

- Why not start by telling me what happened in the emergency department?
- Can you describe your experience, with regards to medications, during your ED visit?
- How was the pharmacist involved in your care during your ED visit?
- How did you experience the collaboration between the pharmacist and the other health care professionals?
- Did you have any questions about your medications and, if so, who did you ask?
- In general, what do you think the hospital needs to know about your medication use?
- What was your experience in terms of medications during your ED visit? What worked well/not well?
- What are your thoughts about the pharmacist being the health professional to ask about your medications? How do you think that may have influenced your ED visit?
- When you think about your medications and how they were managed in the ED, is there anything you discovered or experienced that made you feel reassured or worried?
- How would you describe your overall condition during the ED visit and how do you think that affected your experience of the ED visit?

## Supplement 2 Example of codes and subthemes in a theme

This example shows how data material is coded and sorted into subthemes in the theme “Information is important, but the need for it differs”. The table contains a selection of the codes and subthemes of the main theme.

| Data                                                                                                                            | Code                                        | Subthemes                   | Theme                                                 |
|---------------------------------------------------------------------------------------------------------------------------------|---------------------------------------------|-----------------------------|-------------------------------------------------------|
| Simply put, I don't need to know a lot about my medications.                                                                    | Limited information need                    |                             |                                                       |
| I'm not like «Oh, I need to know”. And I'm neither like «Whatever, as long as it works”. I want to know what I put in my mouth. | Moderate information need                   | Different information needs |                                                       |
| I want to know everything [about my medication]                                                                                 | Large information need                      |                             |                                                       |
| I have a problem with remembering oral information, so I want information about my medication in written form.                  | Want written information                    |                             | Information is important, but the need for it differs |
| I think you first need to get the information orally.                                                                           | Wants oral information                      | Type of information         |                                                       |
| Like... What is it [the medication] called, that's important. And why I need to take it.                                        | Wants information about indication          | desired and how             |                                                       |
| ...about how much [medication] do I need to take and for how long...                                                            | Wants information about dosing and duration |                             |                                                       |
| Like... Are there any side effects I need to consider?                                                                          | Wants information about side effects        |                             |                                                       |
| You feel more confident yourself [with information].                                                                            | Information gives confidence                | Information is important    |                                                       |
